# Supplementary material
Source: ML conference proceedings conference paper supplement (https://aclanthology.org/K19-1045)
Supplement: Supplementary_Material [file K19-1045.Supplementary_Material.zip]

## A Counter Example for Lock-Step Traversal of Multiple Automata

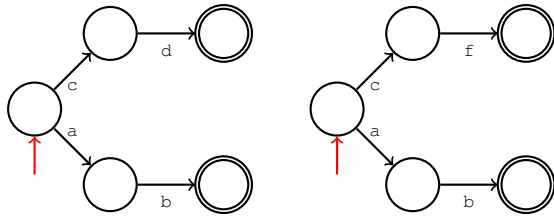

Figure 1: Counter example showing that traversing two automaton in parallel may not find any string in the intersection, even if one exists. The two automaton above have a non-empty intersection (the string  $ab$ ), but if the search algorithm takes the edge  $c$ , then inference will not find any valid string.
